# Supplementary material
Source: publisher figshare collection journal article supplement (https://springernature.figshare.com/ndownloader/files/37718766)
Supplement: Supplementary file 1 [file 37718766]

## Sheet: 1hpf
# CSMs	# Proteins	Sequence A	Accession A	Position A	Sequence B	Accession B	Position B	Protein A	Protein B	Best CSM Score	In protein A	In protein B
54	2	DVHLA[K]HPELADK	Q7T1J9	6	LLQ[K]QDGMDEDVVFR	B0R085	4	Rps10	Habp4	732.66	31	273
21	1	AVVIH[K]SK	B0R085	6	LLQ[K]QDGMDEDVVFR	B0R085	4	Habp4	Habp4	557.83	267	273
10	2	KVVNPLFE[K]RPK	A0A2R8Q9K6	9	FGQLLGDESDPFDILYAAGTE[K]K	B0R085	22	Rpl7a	Habp4	375.33	34	42
8	2	LFCVGFT[K]K	Q6PBY1	8	[K]TILPAGGGGQVRPGHEVVEEPIQR	B0R085	1	Rps3a	Habp4	311.29	144	70
6	2	DYG[K]ESQAK	Q6PC90	4	ALQEQSRP[K]VELNIR	B0R085	9	Rps12	Habp4	356.42	116	246
6	2	LMELHGEGGSTSAAA[K]PAEGDTGAK	Q6PBY1	16	[K]TILPAGGGGQVRPGHEVVEEPIQR	B0R085	1	Rps3a	Habp4	251.05	243	70
5	2	DVIEEYF[K]SK	Q6PC90	8	ALQEQSRP[K]VELNIR	B0R085	9	Rps12	Habp4	436.68	129	246
4	1	KKEEP[K]K	B0R085	6	TSTTT[K]SVK	B0R085	6	Habp4	Habp4	326.43	52	59
3	1	AVVIH[K]SK	B0R085	6	[K]TESSVPSK	B0R085	1	Habp4	Habp4	339.89	267	253
3	1	[K]TESSVPSK	B0R085	1	ALQEQSRP[K]VELNIR	B0R085	9	Habp4	Habp4	456.48	253	246
3	2	AVVIH[K]SK	B0R085	6	[G]HQQLYWSHPR	Q6Q419	1	Habp4	Rps29	413.44	267	2
3	2	IVV[K]VLK	Q7ZWJ7	4	FGQLLGDESDPFDILYAAGTE[K]K	B0R085	22	Rpl34	Habp4	315.68	105	42
3	2	[K]VVNPLFEK	A0A2R8Q9K6	1	FGQLLGDESDPFDILYAAGTE[K]K	B0R085	22	Rpl7a	Habp4	263.18	26	42
3	2	EVQTNDL[K]EVVNK	Q6PBY1	8	[K]TILPAGGGGQVRPGHEVVEEPIQR	B0R085	1	Rps3a	Habp4	376.9	182	70
3	2	AMELL[K]VSK	Q6Q415	6	[K]TILPAGGGGQVRPGHEVVEEPIQR	B0R085	1	Rpl36	Habp4	270.36	62	70
2	1	KKEEP[K]K	B0R085	6	TSTTTKSV[K]K	B0R085	9	Habp4	Habp4	349.79	52	62
2	2	K[K]EEPKK	B0R085	2	AQAQTQ[K]SK	Q7ZWJ7	7	Habp4	Rpl34	265.64	48	115
2	2	VL[K]AQAQTQK	Q7ZWJ7	3	FGQLLGDESDPFDILYAAGTE[K]K	B0R085	22	Rpl34	Habp4	390.92	108	42
1	2	AVVIH[K]SK	B0R085	6	SAAQPGAD[K]K	Q7T1J9	9	Habp4	Rps10	354.31	267	139
1	2	[K]KKEEPK	B0R085	1	VVNPLFE[K]RPK	A0A2R8Q9K6	8	Habp4	Rpl7a	244.17	46	34
1	2	AVVIH[K]SK	B0R085	6	[K]AEAGAGAATEFQFR	Q7T1J9	1	Habp4	Rps10	247.31	267	140
1	3	APP[K]PM	F1QHJ1;Q6P6E2	4	[K]TILPAGGGGQVRPGHEVVEEPIQR	B0R085	1	Rps26	Habp4	228.16	113;113	70
1	2	VWNLANC[K]LK	O42248	8	SPQ[K]FDSAPNPDDPEDFPALA	B0R085	4	Gnb2l1	Habp4	497.46	183	330
2	1	HQSPIEVPD[K]KDDK	F1QHJ4	10	DSTEYETVIPP[K]LPVVVSGVVTK	F1QHJ4	12	Dap	Dap	395.01	39	55
2	2	VTGGAAS[K]LSK	A0A2R8RS24	8	DSTEYETVIPP[K]LPVVVSGVVTK	F1QHJ4	12	Rpl35	Dap	285.52	42	55
4	2	LN[K]AVWAK	Q24JV3	3	AGHLPAV[K]AGGMR	F1QHJ4	8	Rpl31	Dap	351.4	68	20
2	1	KTD[K]PR	F1QEQ3	4	SADENANVE[K]ETR	F1QEQ3	10	Dap1b	Dap1b	192.48	29	22

## Sheet: Xenopus
# CSMs	# Proteins	Sequence A	Accession A	Position A	Sequence B	Accession B	Position B	Protein A	Protein B	Best CSM Score	In protein A	In protein B
1	2	VTQQTGQ[K]R	A0A1L8HPG3	8	LMELHGEGGGSGKPAADETGA[K]VER	A0A1L8HUF5	22	Habp4	Rps3a	385.36	99	249
1	2	VTQNENVDSQV[K]VDR	A0A1L8HPG3	12	LMELHGEGGGTGKPAGDETGA[K]VER	A0A1L8HLR2	22	Habp4	Rps3a	424.77	119	249
1	2	NTE[K]VTQNENVDSQVK	A0A1L8HPG3	4	LMELHGEGGGTGKPAGDETGA[K]VER	A0A1L8HLR2	22	Habp4	Rps3a	429.73	107	249
1	3	AVVIH[K]SK	A0A1L8HPG3;A0A1L8HYF8	6	SAVPSGAD[K]K	B7ZPG6	9	Habp4	Rps10	299.5	297;323	138
1	3	[K]AVVVGGSTDVK	A0A1L8HPG3	1	EVQTNDL[K]EVVNK	A0A1L8HLR2;A0A1L8HUF5	8	Habp4	Rps3a	569.03	80	182;182
1	2	S[K]TELNLR	A0A1L8HPG3	2	VVGCSCVVV[K]DYGK	A0A310U0K2	10	Habp4	Rps12	280.87	276	78
1	3	VTQQTGQ[K]R	A0A1L8HPG3	8	LITEDVQG[K]NCLTNFHGMDLTR	A0A1L8HLR2;A0A1L8HUF5	9	Habp4"	Rps3a	314.68	99	94;94
1	3	VTQNENVDSQV[K]VDR	A0A1L8HPG3	12	LITEDVQG[K]NCLTNFHGMDLTR	A0A1L8HLR2;A0A1L8HUF5	9	Habp4	Rps3a	819.16	119	94;94
1	2	SAEYSIE[K]PMEIMDQDK	A0A1L8HPG3	8	V[K]ADRDESSPYAAMLAAQDVAQR	Q6PI76	2	Habp4	Rps14-prov	674.31	147	63
1	2	VTQNENVDSQV[K]VDR	A0A1L8HPG3	12	DISEASVFDSYALP[K]LYVK	Q6AZL7	15	Habp4	Rps26	752.94	119	66
1	2	DVHMP[K]HPELVDK	A0A1L8H6M8	6	KPETSVPS[K]AVVIHK	A0A1L8HPG3	9	Rps10	Habp4	333.09	350	291
1	2	AQAQSQ[K]AK	A0A1L8HUR4	7	K[K]EEGAAKK	A0A1L8HPG3	2	Rpl34	Habp4	298.13	151	57
1	2	A[K]ELATK	A0A1L8F1B9	2	[K]AVVVGGSTDVK	A0A1L8HPG3	1	Rpl7a	Habp4	270.61	286	80
1	3	EVQTNDL[K]EVVNK	A0A1L8HLR2;A0A1L8HUF5	8	VTQNENVDSQV[K]VDR	A0A1L8HPG3	12	Rps3a	Habp4	537.7	182;182	119
1	3	LFCVGFT[K]K	A0A1L8HLR2;A0A1L8HUF5	8	VTQNENVDSQV[K]VDR	A0A1L8HPG3	12	Rps3a	Habp4	424.76	144;144	119
1	2	[K]AAVVGGNTDVK	A0A1L8HYF8	1	LMELHGEGGGTGKPAGDETGA[K]VER	A0A1L8HLR2	22	Habp4	Rps3a	418.66	80	249
1	2	[K]AAVVGGNTDVK	A0A1L8HYF8	1	LMELHGEGGGTG[K]PAGDETGAK	A0A1L8HLR2	13	Habp4	Rps3a	604.07	80	240
1	2	APQNENVGSQV[K]VDR	A0A1L8HYF8	12	DNYVPEVSALDQEIIEVDPDT[K]EMLK	A0A1L8H046	22	Habp4	Rps17	441.32	145	103
1	2	AQAQSQ[K]AK	A0A1L8HUR4	7	K[K]EDAAAKK	A0A1L8HYF8	2	Rpl34	Habp4	451.09	151	57
1	3	EVQTNDL[K]EVVNK	A0A1L8HLR2;A0A1L8HUF5	8	APQNENVGSQV[K]VDR	A0A1L8HYF8	12	Rps3a	Habp4	542.26	182;182	145
1	3	LFCVGFT[K]K	A0A1L8HLR2;A0A1L8HUF5	8	APQNENVGSQV[K]VDR	A0A1L8HYF8	12	Rps3a	Habp4	443.3	144;144	145
1	1	NANQ[K]SGK	A0A1L8HPG3	5	[K]AVVVGGSTDVK	A0A1L8HPG3	1	Habp4	Habp4	298.57	69	80
1	1	KPEAAVPT[K]AVVIHK	A0A1L8HYF8	9	F[K]NNLSENEEDYHYCFR	A0A1L8HYF8	2	Habp4	Habp4	365.16	317	327
1	1	[K]AAVVGGNTDVK	A0A1L8HYF8	1	MTPQTESG[K]VSQK	A0A1L8HYF8	9	Habp4	Habp4	637.08	80	100
1	1	VTQPGQ[K]HAPK	A0A1L8HYF8	7	[K]TFVVGGNTDVK	A0A1L8HYF8	1	Habp4	Habp4	311.71	125	107
1	1	[K]TFVVGGNTDVK	A0A1L8HYF8	1	MTPQTESG[K]VSQK	A0A1L8HYF8	9	Habp4	Habp4	358.27	107	100
2	3	VTQQTGQ[K]R	A0A1L8HPG3	8	EVQTNDL[K]EVVNK	A0A1L8HLR2;A0A1L8HUF5	8	Habp4	Rps3a	402.91	99	182;182
2	2	K[K]EEGAAK	A0A1L8HPG3	2	VL[K]AQAQSQK	A0A1L8HUR4	3	Habp4	Rpl34	398.43	57	144
2	2	K[K]EEGAAK	A0A1L8HPG3	2	VAPAPSVV[K]K	A0A1L8F1B9	9	Habp4	Rpl7a	268.6	57	47
2	2	RAP[K]NTEK	A0A1L8HPG3	4	LMELHGEGGGTG[K]PAGDETGAK	A0A1L8HLR2	13	Habp4	Rps3a	271.82	103	240
2	2	NTE[K]VTQNENVDSQVK	A0A1L8HPG3	4	LMELHGEGGGTG[K]PAGDETGAK	A0A1L8HLR2	13	Habp4	Rps3a	766.1	107	240
2	4	AVVIH[K]SK	A0A1L8HPG3;A0A1L8HYF8	6	[K]AEAGAGAATEFQFR	B7ZPG6;A0A1L8H6M8	1	Habp4	Rps10	347.49	297;323	139;458
2	2	VTQQTGQ[K]R	A0A1L8HPG3	8	DIE[K]ACQSIYPLHDVYVR	A0A1L8HLR2	4	Habp4	Rps3a	276	99	199
2	2	SAEYSIE[K]PMEIMDQDK	A0A1L8HPG3	8	DISEASVFDSYALP[K]LYVK	Q6AZL7	15	Habp4	Rps26	658.25	147	66
2	3	LFCVGFT[K]K	A0A1L8HLR2;A0A1L8HUF5	8	NTE[K]VTQNENVDSQVK	A0A1L8HPG3	4	Rps3a	Habp4	541.44	144;144	107
2	4	A[K]ELATK	A0A1L8F1B9	2	ESQ[K]DRK	A0A1L8HPG3;A0A1L8HYF8	4	Rpl7a	Habp4	288.23	286	66;77;77
2	3	NLG[K]TLVTR	A0A1L8HLR2;A0A1L8HUF5	4	VTQNENVDSQV[K]VDR	A0A1L8HPG3	12	Rps3a	Habp4	305.26	46;46	119
2	3	DWYDV[K]APAMFNIR	A0A1L8HLR2;A0A1L8HUF5	6	NTE[K]VTQNENVDSQVK	A0A1L8HPG3	4	Rps3a	Habp4	676.92	34;34	107
2	3	DWYDV[K]APAMFNIR	A0A1L8HLR2;A0A1L8HUF5	6	VTQNENVDSQV[K]VDR	A0A1L8HPG3	12	Rps3a	Habp4	606.91	34;34	119
2	3	K[K]KEDAAAK	A0A1L8HYF8	2	VVNPLFE[K]RPK	A0A1L8F671;A0A1L8F1B9	8	Habp4	Rpl7a	305.57	56	34;61
2	2	SNEYSIE[K]PMEILDQDK	A0A1L8HYF8	8	V[K]ADRDESSPYAAMLAAQDVAQR	Q6PI76	2	Habp4	Rps14-prov	820.86	173	63
2	3	VA[K]SNR	Q7SYU3;A0A1L8F8E2	3	APQNENVGSQV[K]VDR	A0A1L8HYF8	12	Rps5	Habp4	294.66	200;200	145
2	1	KPETSVPS[K]AVVIHK	A0A1L8HPG3	9	Y[K]NNISENEEESQYCFR	A0A1L8HPG3	2	Habp4	Habp4	570.87	291	301
2	1	VTQPGQ[K]HAPK	A0A1L8HYF8	7	NME[K]APQNENVGSQVK	A0A1L8HYF8	4	Habp4	Habp4	388.06	125	133
3	2	[K]AVVVGGSTDVK	A0A1L8HPG3	1	LMELHGEGGGTGKPAGDETGA[K]VER	A0A1L8HLR2	22	Habp4	Rps3a	400.54	80	249
3	2	VTQQTGQ[K]R	A0A1L8HPG3	8	LMELHGEGGGTG[K]PAGDETGAK	A0A1L8HLR2	13	Habp4	Rps3a	394.43	99	240
3	3	QNSLL[K]R	A0A1L8HNA1	6	AVVIH[K]SK	A0A1L8HPG3;A0A1L8HYF8	6	Rps15	Habp4	318.44	68	297;323
3	3	APQNENVGSQV[K]VDR	A0A1L8HYF8	12	DWYDV[K]APAMFNIR	A0A1L8HLR2;A0A1L8HUF5	6	Habp4	Rps3a	534.34	145	34;34
3	3	KKEDAAA[K]K	A0A1L8HYF8	8	VVNPLFE[K]RPK	A0A1L8F671;A0A1L8F1B9	8	Habp4	Rpl7a	264.49	63	34;61
3	3	K[K]EDAAAKK	A0A1L8HYF8	2	VVNPLFE[K]RPK	A0A1L8F671;A0A1L8F1B9	8	Habp4	Rpl7a	277.77	57	34;61
3	3	AIRPED[K]R	A0A1L8HYF8	7	Y[K]LLGGLAVR	A0A1L8HJY0;Q7ZYT3	2	Habp4	Rps3	286.15	231	108;108
3	2	VT[K]VLGR	Q66KP7	3	APQNENVGSQV[K]VDR	A0A1L8HYF8	12	Rps28	Habp4	298.45	16	145
3	1	VTQQTGQ[K]R	A0A1L8HPG3	8	VTQNENVDSQV[K]VDR	A0A1L8HPG3	12	Habp4	Habp4	430.73	99	119
3	1	RAP[K]NTEK	A0A1L8HPG3	4	AVVVGGSTDV[K]VTQQTGQK	A0A1L8HPG3	11	Habp4	Habp4	319.01	103	91
4	3	AVVIH[K]SK	A0A1L8HPG3;A0A1L8HYF8	6	[G]HQQLYWSHPR	A0A1L8F058	1	Habp4	Rps29	353.32	297;323	2
4	3	TQNVLGE[K]GR	A0A1L8HJY0;Q7ZYT3	8	VPEE[K]NEGFSQEMSLDEWR	A0A1L8HYF8	5	Rps3	Habp4	475.95	62;62	279
4	2	CCLTYCFN[K]PEDK	Q6GMC1	9	KPEAAVPT[K]AVVIHK	A0A1L8HYF8	9	Rps27a	Habp4	550.91	152	317
5	3	VTQQTGQ[K]R	A0A1L8HPG3	8	DWYDV[K]APAMFNIR	A0A1L8HLR2;A0A1L8HUF5	6	Habp4	Rps3a	414	99	34;34
5	2	DVHMP[K]HPELADK	B7ZPG6	6	Y[K]NNISENEEESQYCFR	A0A1L8HPG3	2	Rps10	Habp4	558.94	31	301
5	2	VT[K]VLGR	Q66KP7	3	SAEYSIE[K]PMEIMDQDK	A0A1L8HPG3	8	Rps28	Habp4	312.98	16	147
5	2	CCLTYCFN[K]PEDK	Q6GMC1	9	KPETSVPS[K]AVVIHK	A0A1L8HPG3	9	Rps27a	Habp4	627.11	152	291
5	2	VT[K]VLGR	Q66KP7	3	SNEYSIE[K]PMEILDQDK	A0A1L8HYF8	8	Rps28	Habp4	270.61	16	173
5	2	DVHMP[K]HPELADK	B7ZPG6	6	F[K]NNLSENEEDYHYCFR	A0A1L8HYF8	2	Rps10	Habp4	564.39	31	327
5	1	VTQQTGQ[K]R	A0A1L8HPG3	8	NTE[K]VTQNENVDSQVK	A0A1L8HPG3	4	Habp4	Habp4	401.36	99	107
6	2	VTQQTGQ[K]R	A0A1L8HPG3	8	LMELHGEGGGTGKPAGDETGA[K]VER	A0A1L8HLR2	22	Habp4	Rps3a	403.65	99	249
6	2	S[K]TELNLR	A0A1L8HPG3	2	DYG[K]ESQAK	A0A310U0K2	4	Habp4	Rps12	303.71	276	82
6	2	S[K]TELNLR	A0A1L8HPG3	2	DVIEEYF[K]SK	A0A310U0K2	8	Habp4	Rps12	302.12	276	95
6	2	K[K]EDAAAK	A0A1L8HYF8	2	AQAQSQ[K]AK	A0A1L8HUR4	7	Habp4	Rpl34	554.03	57	151
6	2	DVHMP[K]HPELVDK	A0A1L8H6M8	6	F[K]NNLSENEEDYHYCFR	A0A1L8HYF8	2	Rps10	Habp4	435.86	350	327
6	3	ESQ[K]DRK	A0A1L8HPG3;A0A1L8HYF8	4	VTQQTGQ[K]R	A0A1L8HPG3	8	Habp4	Habp4	265.8	66;77;77	99
7	2	K[K]EEGAAK	A0A1L8HPG3	2	AQAQSQ[K]AK	A0A1L8HUR4	7	Habp4	Rpl34	416.25	57	151
7	1	VTQQTGQ[K]R	A0A1L8HPG3	8	[K]AVVVGGSTDVK	A0A1L8HPG3	1	Habp4	Habp4	460.72	99	80
7	1	RAP[K]NTEK	A0A1L8HPG3	4	VTQNENVDSQV[K]VDR	A0A1L8HPG3	12	Habp4	Habp4	392.28	103	119
7	1	S[K]TELNLR	A0A1L8HPG3	2	[K]PETSVPSK	A0A1L8HPG3	1	Habp4	Habp4	271.28	276	283
8	3	LFCVGFT[K]K	A0A1L8HLR2;A0A1L8HUF5	8	VTQQTGQ[K]R	A0A1L8HPG3	8	Rps3a	Habp4	478.54	144;144	99
8	2	AVVIH[K]SK	A0A1L8HPG3;A0A1L8HYF8	6	Y[K]NNISENEEESQYCFR	A0A1L8HPG3	2	Habp4	Habp4	478.53	297;323	301
9	1	[K]SANQK	A0A1L8HYF8	1	K[K]EDAAAK	A0A1L8HYF8	2	Habp4	Habp4	324.03	64	57
10	1	AP[K]NTEK	A0A1L8HPG3	3	VTQQTGQ[K]R	A0A1L8HPG3	8	Habp4	Habp4	285.76	103	99
12	3	K[K]EEGAAK	A0A1L8HPG3	2	KVVNPLFE[K]RPK	A0A1L8F671;A0A1L8F1B9	9	Habp4	Rpl7a	345.57	57	34;61
13	2	KDVHMP[K]HPELVDK	A0A1L8H6M8	7	Y[K]NNISENEEESQYCFR	A0A1L8HPG3	2	Rps10	Habp4	715.72	350	301
14	2	AVVIH[K]SK	A0A1L8HPG3;A0A1L8HYF8	6	F[K]NNLSENEEDYHYCFR	A0A1L8HYF8	2	Habp4	Habp4	477.14	297;323	327
1	2	EL[K]VQSSPQALK	A0A1L8EP22	3	[K]RNEDEDSPNK	A0A1L8H8P5	1	DapL1.S	Rpl31	430.89	6	113
18	4	LN[K]AVWAK	A0A1L8EJF0;A0A1L8H8P5	3	AGHLPAV[K]AGGMR	A0A1L8EP22;A0A1L8EW14	8	Rpl31	DapL1.S	486.09	55;92	23;23
6	3	VTGGAAS[K]LSK	A0A1L8F6D5	8	TLQE[K]PSSVLNMTK	A0A1L8EP22;A0A1L8EW14	5	Rpl35	DapL1.S	527.01	57	52;52
2	2	[K]RNEDEDSPNK	A0A1L8H8P5	1	KQGNDENSAPE[K]NAK	A0A1L8EP22	12	Rpl31	DapL1.S	354.91	113	43
5	2	[K]RNEDEDSPNK	A0A1L8H8P5	1	KQGNEENSAPE[K]NAK	A0A1L8EW14	12	Rpl31	DapL1.L	412.98	113	43
2	2	[K]RNEDEDSPNK	A0A1L8H8P5	1	EQ[K]MQSSPQALK	A0A1L8EW14	3	Rpl31	DapL1.L	495.57	113	6
